# Supplementary material
Source: Springer Nature journal article supplement (https://www.springermedizin.de/resource/supplementary/12967_2011_808_MOESM2_ESM.pdf/9577082)

A

SUPERNATANT

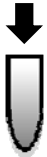

B

CENTRIFUGE

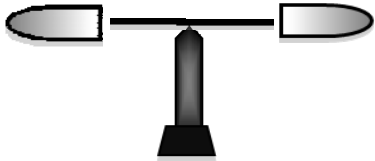

C

DECANT

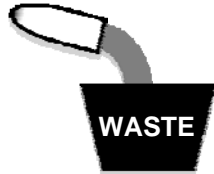

D

SUPERNATANT

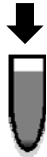

**REPEAT:  
4 rounds of  
centrifugation total**

Supplement: MOESM2 [file 9577082]
